# Supplementary material for: Investigating self-recognition in bonobos: mirror exposure reduces looking time to self but not unfamiliar conspecifics
Source: PeerJ. 2020 Aug 28;8:e9685. doi: 10.7717/peerj.9685 (PMC7457926; doi:10.7717/peerj.9685)
Supplement: Data S1 [file peerj-08-9685-s005.xlsx]

## Sheet: Sheet1
Electronic Supplementary Material 5: Research data
		Total looking time (sec)
		Mirror-naïve					Mirror-experienced
INDIVIDUAL	AGE (Mo.)	C self	mirror	NC self	known	unknown	NC self	unknown
Lisala	405	1.96	5.68	3.88	10.64	12.92	0.68	2.12
Kirembo	253	0.28	1	5.32	4.52	10.88	4.52	13.88
Ulindi	243	1.8	8.52	13.56	0.68	15.2	7.48	30
Diwani	209	7.16	2.28	20.84	18.24	30	9.8	4.48
David	150	19.84	1.88	25.8	11.48	27.16	3.96	15.76
Khaya	147	0.36	3.36	29.04	27.76	17.16	7.28	21.2
Lingala	126	12.68	9.2	29.72	2.72	19.12	11.32	29.56
Kelele	114	8.12	11.76	23.4	23.24	30	21.48	30
